# The effect of treatment on the microbiota of patients diagnosed with colonic lesions

Marc A Sze<sup>1</sup>, Nielson T Baxter<sup>1,2</sup>, Mack T Ruffin IV<sup>3</sup>, Mary AM Rogers<sup>2</sup>, and Patrick D Schloss<sup>1†</sup>

† To whom correspondence should be addressed: [pschloss@umich.edu](mailto:pschloss@umich.edu)

<sup>1</sup> Department of Microbiology and Immunology, University of Michigan, Ann Arbor, MI

<sup>2</sup> Department of Internal Medicine, University of Michigan, Ann Arbor, MI

<sup>3</sup> Department of Family Medicine and Community Medicine, Penn State Hershey Medical Center, Hershey, PA

## 1 **Abstract**

2 **Background.** Colorectal cancer (CRC) is a worldwide health problem. Despite growing  
3 evidence that members of the gut microbiota can drive tumorigenesis, little is known about  
4 what happens to the microbiota after treatment for an adenoma or carcinoma. This study  
5 tested the hypothesis that treatment for adenoma or carcinoma alters the abundance of  
6 bacterial populations associated with disease to those associated with a normal colon. We  
7 tested this hypothesis by sequencing the 16S rRNA genes in the feces of 67 individuals  
8 before and after treatment for adenoma (N = 22), advanced adenoma (N = 19), and  
9 carcinoma (N = 26).

10 **Results.** There were large changes to the bacterial communities associated with  
11 treatment across the three groups. The communities from patients with carcinomas  
12 changed significantly more than those with adenoma following treatment (P-value <  
13 0.001). There was no significant change in the microbiota between patients with adenoma  
14 and advanced adenoma, or between patients with advanced adenoma and carcinoma  
15 (P-value > 0.05). Although treatment was associated with intrapersonal changes, the  
16 change in the abundance of individual OTUs to treatment was not consistent within  
17 diagnosis groups (P-value > 0.05). Because the distribution of OTUs across patients and  
18 diagnosis groups was irregular, we used the Random Forest machine learning algorithm  
19 to identify groups of OTUs that allowed us to successfully distinguish between pre and  
20 post-treatment samples for each of the diagnosis groups. Although the three models  
21 successfully differentiated between the pre and post-treatment samples, there was little  
22 overlap between the OTUs that were indicative of treatment. Next, we used a larger  
23 cohort that contained individuals with normal colons and those with adenomas, advanced  
24 adenomas, and carcinomas to determine whether individuals who underwent treatment  
25 were more likely to have OTUs associated with normal colons. We again built Random  
26 Forest models and measured the change in the positive probability of having one of the

27 three diagnoses. Only patients who had carcinomas experienced a significant decrease in  
28 positive probability of having a lesion after treatment (P-value < 0.05), indicating that the  
29 microbial milieu of the colon more closely resembled that of a normal colon. Finally, we  
30 tested whether the type of treatment impacted the microbiota of those diagnosed with  
31 carcinomas and were unable to detect any significant differences in characteristics of  
32 these communities between individuals treated with surgery alone and those treated with  
33 chemotherapy or chemotherapy and radiation (P-value > 0.05).

34 **Conclusions.** By better understanding the response of the microbiota to treatment for  
35 adenomas and carcinomas, it is likely that biomarkers will be validated that can be used to  
36 quantify the risk of recurrence and the likelihood of survival.

### 37 **Keywords**

38 microbiota; colorectal cancer; polyps; treatment; risk factor.

## 39 Background

40 Colorectal cancer (CRC) is the third most common cause of cancer deaths in the  
41 United States [1,2]. Disease mortality has significantly decreased, predominately due to  
42 improvements in screening [2]. Despite these improvements, there are still approximately  
43 50,000 CRC-related deaths per year in the United States [1]. Current estimates indicate  
44 that 20-30% of those who undergo treatment will experience recurrence and 35% of all  
45 patients will die within five years [3–5]. Identification of methods to assess patients' risk of  
46 recurrence is of great importance to reduce mortality and healthcare costs.

47 There is growing evidence that the gut microbiota is involved in the progression of CRC.  
48 Mouse-based studies have identified populations of *Bacteroides fragilis*, *Escherichia coli*,  
49 and *Fusobacterium nucleatum* that alter disease progression [6–10]. Furthermore, studies  
50 that shift the structure of the microbiota through the use of antibiotics or inoculation of  
51 germ free mice with human feces have shown that varying community compositions can  
52 result in varied tumor burden [11–13]. Collectively, these studies support the hypothesis  
53 that the microbiota can alter the amount of inflammation in the colon and with it the rate of  
54 tumorigenesis [14].

55 Building upon this evidence, several human studies have identified unique signatures of  
56 colonic lesions [15–20]. One line of research has identified community-level differences  
57 between those bacteria that are found on and adjacent to colonic lesions and have  
58 supported a role for *Bacteroides fragilis*, *Escherichia coli*, and *Fusobacterium nucleatum*  
59 in tumorigenesis [21–23]. Others have proposed feces-based biomarkers that could be  
60 used to diagnose the presence of colonic adenomas and carcinomas [24–26]. These  
61 studies have associated *Fusobacterium nucleatum* and other oral pathogens with colonic  
62 lesions (adenoma, advanced adenoma, and carcinoma). They have also noted that the  
63 loss of bacteria generally thought to produce short chain fatty acids, which can suppress

64 inflammation, is associated with colonic lesions. This suggests that gut bacteria have a  
65 role in tumorigenesis with potential as useful biomarkers for aiding in the early detection of  
66 disease [21–26].

67 Despite advances in understanding the role between the gut microbiota and colonic  
68 tumorigenesis, we still do not understand how treatments including resection,  
69 chemotherapy, and/or radiation affect the composition of the gut microbiota. If the  
70 microbial community drives tumorigenesis then one would hypothesize that treatment to  
71 remove a lesion would affect the microbiota and risk of recurrence. To test this hypothesis,  
72 we addressed two related questions: Does treatment affect the colonic microbiota in  
73 a predictable manner? If so, does the treatment alter the community to more closely  
74 resemble that of individuals with normal colons?

75 We answered these questions by sequencing the V4 region of 16S rRNA genes amplified  
76 from fecal samples of individuals with adenoma, advanced adenoma, and carcinomas  
77 pre and post-treatment. We used classical community analysis to compare the alpha  
78 and beta-diversity of communities pre and post-treatment. Next, we generated Random  
79 Forest models to identify bacterial populations that were indicative of treatment for each  
80 diagnosis group. Finally, we measured the predictive probabilities to assess whether  
81 treatment yielded bacterial communities similar to those individuals with normal colons.  
82 We found that treatment alters the composition of the gut microbiota and that, for those  
83 with carcinomas, the gut microbiota shifted more towards that of a normal colon after  
84 treatment. In the individuals with carcinomas, no difference was found by the type of  
85 treatment (surgery alone versus surgery with chemotherapy). Understanding how the  
86 community responds to these treatments could be a valuable tool for identifying biomarkers  
87 to quantify the risk of recurrence and the likelihood of survival.

## 88 Results

89 ***Treatment alters the bacterial community structure of patients diagnosed with***  
90 ***colonic lesions.*** Within our 67-person cohort we tested whether the microbiota of patients  
91 with adenoma (N = 22), advanced adenoma (N = 19), or carcinoma (N = 26) had any  
92 broad differences between pre and post-treatment samples [Table 1]. The structure of the  
93 microbial communities of the pre and post-treatment samples differed, as measured by the  
94  $\theta_{YC}$  beta diversity metric [Figure 1A]. We found that the communities obtained pre and  
95 post-treatment among the patients with carcinomas changed significantly more than those  
96 patients with adenoma (P-value < 0.001). There were no significant differences in the  
97 amount of change observed between the patients with adenoma and advanced adenoma  
98 or between the patients with advanced adenoma and carcinoma (P-value > 0.05). Next,  
99 we tested whether there was a consistent direction in the change in the community  
100 structure between the pre and post-treatment samples for each of the diagnosis groups  
101 [Figure 1B-D]. We only observed a consistent shift in community structure for the patients  
102 with carcinoma when using a PERMANOVA test (adenoma P-value = 0.999, advanced  
103 adenoma P-value = 0.945, and carcinoma P-value = 0.005). Finally, we measured the  
104 number of observed OTUs, Shannon evenness, and Shannon diversity in the pre and  
105 post-treatment samples and did not observe a significant change for any of the diagnosis  
106 groups (P-value > 0.05) [Table S1].

107 ***The effects of treatment are not consistent across treatment groups.*** We used two  
108 approaches to identify those bacterial populations that change between the two samples  
109 for each diagnosis group. First, we sought to identify individual OTUs that could account for  
110 the change in overall community structure. However, using a paired Wilcoxon test we were  
111 unable to identify any OTUs that were significantly different in the pre and post-treatment  
112 groups (P-value > 0.05). It is likely that high inter-individual variation and the irregular  
113 distribution of OTUs across individuals limited the statistical power of the test. To overcome

114 these problems we developed Random Forest models to identify collections of OTUs that  
115 would allow us to differentiate between pre and post-treatment samples from each of the  
116 diagnosis groups. To limit the likelihood that the models would overfit the data because  
117 of the relatively small number of subjects in each group, we restricted our models to only  
118 incorporate 10 OTUs. Despite this restriction, the models performed well (adenoma AUC  
119 range = 0.69 - 0.92, advanced adenoma AUC range = 0.80 - 1.00, carcinoma AUC range  
120 = 0.82 - 0.98). Interestingly, the 10 OTUs that were used for each model had little overlap  
121 with each other [Figure 2]. These results support the earlier community-wide analysis  
122 where we observed that the treatment had an impact on the overall community structure;  
123 however, the effect of treatment was not consistent across patients and diagnosis groups.

124 ***Post-treatment samples from patients with carcinoma more closely resemble those***  
125 ***of a normal colon.*** Next, we determined whether treatment changed the microbiota in a  
126 way that the post-treatment communities resembled that of patients with normal colons.  
127 To test this, we used an expanded cohort of 423 individuals that were diagnosed under  
128 the same protocol as having normal colons or colons with adenoma, advanced adenoma,  
129 or carcinoma [Table 2]. We then constructed Random Forest models to classify the study  
130 samples, with the 3 diagnosis groups (adenoma, advanced adenoma, or carcinoma), or  
131 having a normal colon. The models performed well (adenoma AUC range = 0.62 - 0.72,  
132 advanced adenoma AUC range = 0.68 - 0.77, carcinoma AUC range = 0.84 - 0.90; Figure  
133 S1). The OTUs that were incorporated into the adenoma and advanced adenoma models  
134 largely overlapped and those OTUs that were used to classify the carcinoma samples were  
135 largely distinct from those of the other two models [Figure 3A]. Among the OTUs that were  
136 shared across the three models were those populations generally considered beneficial to  
137 their host (e.g. *Faecalibacterium*, *Lachnospiraceae*, *Bacteroides*, *Dorea*, *Anaerostipes*, and  
138 *Roseburia*) [Figures 3B]. Although many of these OTUs were also included in the model  
139 differentiating between patients with normal colons and those with carcinoma, this model  
140 also included OTUs affiliated with populations that have previously been associated with

141 carcinoma (*Fusobacterium*, *Porphyromonas*, *Parvimonas*) [24–26] [Figure S2] with some  
142 individuals showing are marked decrease in relative abundance [Figure S3]. Finally, we  
143 applied these three models to the pre and post-treatment samples for each diagnosis group  
144 and quantified the change in the positive probability of the model. A decrease in the positive  
145 probability would indicate that the microbiota more closely resembled that of a patient  
146 with a normal colon. There was no significant change in the positive probability for the  
147 adenoma or advanced adenoma groups [Figure 4]. The positive probability for the pre and  
148 post-treatment samples from patients diagnosed with carcinoma significantly decreased  
149 with treatment, suggesting a shift toward a normal microbiota for most individuals. Only, 6  
150 of the 26 patients (23.08%) who were diagnosed with a carcinoma had a higher positive  
151 probability after treatment; one of those was re-diagnosed with carcinoma on the follow up  
152 visit. These results indicate that, although there were changes in the microbiota associated  
153 with treatment, those experienced by patients with carcinoma after treatment yielded gut  
154 bacterial communities of greater similarity to that of a normal colon.

155 ***Difficult to identify effects of specific treatments on the change in the microbiota.***

156 The type of treatment that the patients received varied across diagnosis groups. Those  
157 with adenomas and advanced adenomas received surgical resection (adenoma, N=4;  
158 advanced adenoma, N=4) or polyp removal during colonoscopy (adenoma, N=18;  
159 advanced adenoma, N=15) and those with carcinomas received surgical resection (N=12),  
160 surgical resection with chemotherapy (N=9), and surgical resection with chemotherapy  
161 and radiation (N=5). We focused on the patients with carcinoma and pooled those patients  
162 that received chemotherapy with those that received chemotherapy and radiation to  
163 improve our statistical power. We did not observe a significant difference in the effect  
164 of these treatments on the number of observed OTUs, Shannon diversity, or Shannon  
165 evenness ( $P$ -value > 0.05). Furthermore, there was not a significant difference in the effect  
166 of the treatments on the amount of change in the community structure ( $P$ -value = 0.298).  
167 Finally, the change in the positive probability was not significantly different between the



168 two treatment groups (P-value = 0.999). Due to the relatively small number of samples in  
169 each treatment group, it was difficult to make a definitive statement regarding the specific  
170 type of treatment on the amount of change in the structure of the microbiota.

## 171 Discussion

172 Our study focused on comparing the microbiota of patients diagnosed with adenoma,  
173 advanced adenoma, and carcinoma before and after treatment. For all three groups of  
174 patients, we observed changes in their microbiota. After treatment, the microbiota of  
175 patients with carcinoma changed significantly more than the other groups. This change  
176 resulted in communities that more closely resembled those of patients with a normal colon.  
177 This may suggest that treatment for carcinoma is not only successful for removing the  
178 carcinoma but also at reducing the associated bacterial communities. Understanding  
179 the effect of treatment on the microbiota of those diagnosed with carcinomas may have  
180 important implications for reducing disease recurrence. It is intriguing that it may be  
181 possible to use microbiome-based biomarkers to not only predict the presence of lesions  
182 but to assess the risk of recurrence.

183 Patients diagnosed with adenoma and advanced adenoma, however, did not experience a  
184 shift towards a community structure that resembled those with normal colons. This may  
185 be due to the fundamental differences between the features of adenomas and advanced  
186 adenomas and carcinoma. Specifically, carcinomas may create an inflammatory milieu that  
187 would impact the structure of the community and removal of that stimulus would alter said  
188 structure. It is possible that the difference between the microbiota of patients with adenoma  
189 and advanced adenoma and those with normal colons is subtle. This is supported by the  
190 reduced ability of our models to correctly classify patients with adenomas and advanced  
191 adenomas relative to those diagnosed with carcinomas [Figure S1]. Given the irregular  
192 distribution of microbiota across patients in the different diagnosis groups, it is possible that  
193 we lacked the statistical power to adequately characterize the change in the communities  
194 following treatment.

195 There was a subset of patients (6 of the 26 with carcinomas) who demonstrated an elevated

196 probability of carcinoma after treatment. This may reflect an elevated risk of recurrence.  
197 The 23.08% prevalence of increased carcinoma probability from our study is within the  
198 expected rate of recurrence (20-30% [3,4]). We hypothesized that these individuals may  
199 have had more severe tumors; however, the tumor severity of these 6 individuals (3 with  
200 Stage II and 3 with Stage III) was similar to the distribution observed among the other 20  
201 patients. We also hypothesized that we may have sampled these patients later than the  
202 rest and their communities may have reverted to a carcinoma-associated state; however,  
203 there was not a statistically significant difference in the length of time between sample  
204 collection among those whose probabilities increased (358 (336 - 458) days) or decreased  
205 (334 (256 - 399) days) (Wilcoxon Test; P-value = 0.56) (all days data displayed as median  
206 (IQR)). Finally, it is possible that these patients may not have responded to treatment as  
207 well as the other 20 patients diagnosed with carcinoma and so the microbiota may not have  
208 been impacted the same way. Again, further studies looking at the role of the microbiota in  
209 recurrence are needed to understand the dynamics following treatment.

210 Our final hypothesis was that the specific type of treatment altered the structure of  
211 the microbiome. The treatment to remove adenomas and advanced adenomas was  
212 either polyp removal or surgical resection whereas it was surgical resection alone or  
213 in combination with chemotherapy or with chemotherapy and radiation for individuals  
214 with carcinoma. Because chemotherapy and radiation target rapidly growing cells, these  
215 treatments would be more likely to cause a turnover of the colonic epithelium driving  
216 a more significant change in the structure of the microbiota. Although, we were able  
217 to test for an effect across these specific types of treatment, the number of patients in  
218 each treatment group was relatively small. Finally, those undergoing surgery would have  
219 received antibiotics and this may be a potential confounder. However, our pre-treatment  
220 stool samples were obtained before the surgery and the post-treatment samples were  
221 obtained long after any effects due to antibiotic administration on the microbiome would be  
222 expected to occur (344 (266 - 408) days).

223 This study expands upon existing research that has established a role for the microbiota in  
224 tumorigenesis and that demonstrated the utility of microbiome-based biomarkers to predict  
225 the presence of colonic lesions. The most exciting future direction from the current study is  
226 the possibility that markers within the microbiota could be used to evaluate the effect of  
227 treatment and predict recurrence for those diagnosed with carcinoma. If such an approach  
228 is effective, it might be possible to target the microbiota as part of adjuvant therapy. Our  
229 data provides additional evidence on the importance of the microbiota in tumorigenesis by  
230 addressing the recovery of the microbiota after treatment and opens interesting avenues  
231 of research into how these changes may affect recurrence.

## 232 **Methods**

233 **Study Design and Patient Sampling.** Sampling and design have been previously  
234 reported in Baxter, et al [24]. Briefly, study exclusion involved those who had already  
235 undergone surgery, radiation, or chemotherapy, had colorectal cancer before a baseline  
236 fecal sample could be obtained, had IBD, a known hereditary non-polyposis colorectal  
237 cancer, or familial adenomatous polyposis. Samples used to build the models for  
238 prediction were collected either prior to a colonoscopy or between one and two weeks  
239 after initial colonoscopy. The bacterial community has been shown to normalize back to  
240 a pre-colonoscopy community within this time period [27]. Our study cohort consisted  
241 of 67 individuals with an initial sample as described and a follow up sample obtained  
242 between 188 - 546 days after treatment of lesion [Table 1]. Patients were diagnosed by  
243 colonoscopic examination and histopathological review of any biopsies taken. Patients  
244 were classified as having advanced adenoma if they had an adenoma greater than 1  
245 cm, more than three adenomas of any size, or an adenoma with villous histology. This  
246 study was approved by the University of Michigan Institutional Review Board. All study  
247 participants provided informed consent and the study itself conformed to the guidelines set  
248 out by the Helsinki Declaration.

249 **16S rRNA Gene Sequencing.** Sequencing was completed as described by Kozich, et al.  
250 [28]. DNA extraction used the 96-well Soil DNA isolation kit (MO BIO Laboratories) and  
251 an epMotion 5075 automated pipetting system (Eppendorf). The V4 variable region was  
252 amplified and the resulting product was split between four sequencing runs with normal,  
253 adenoma, and carcinoma evenly represented on each run. Each group was randomly  
254 assigned to avoid biases based on sample collection location. The pre and post-treatment  
255 samples were sequenced on the same run.

256 **Sequence Processing.** The mothur software package (v1.37.5) was used to process

257 the 16S rRNA gene sequences and has been previously described [28]. The general  
258 workflow using mothur included merging paired-end reads into contigs, filtering for low  
259 quality contigs, aligning to the SILVA database [29], screening for chimeras using UCHIME  
260 [30], classifying with a naive Bayesian classifier using the Ribosomal Database Project  
261 (RDP)[31], and clustered into Operational Taxonomic Units (OTUs) using a 97% similarity  
262 cutoff with an average neighbor clustering algorithm [32]. The number of sequences for  
263 each sample was rarefied to 10523 to minimize the impacts of uneven sampling.

264 **Model Building.** The Random Forest [33] algorithm was used to create the three models  
265 used to classify pre and post-treatment samples by diagnosis (adenoma, advanced  
266 adenoma, or carcinoma). The total number of individuals in the pre versus post-treatment  
267 models was 67 individuals. There were a total of 22 individuals in the pre versus  
268 post-treatment adenoma model, 19 individuals in the pre versus post-treatment advanced  
269 adenoma model, and 26 individuals in the pre versus post-treatment carcinoma model  
270 [Table 1].

271 Similarly, the Random Forest [33] algorithm was also used to create the three models used  
272 to classify normal versus diagnosis. The total number of individuals in the normal versus  
273 diagnosis models was 423 individuals [Table 2]. There were a total of 239 individuals in the  
274 normal versus adenoma model, 262 individuals in the normal versus advanced adenoma  
275 model, and 266 individuals in the normal versus carcinoma model [Table 2].

276 All models included only OTU data obtained from 16S rRNA sequencing and were  
277 processed and cleaned using the R package caret (v6.0.73). Optimization of the mtry  
278 hyper-parameter involved making 100 different 80/20 (train/test) splits of the data where  
279 the same proportion was present within both the whole data set and the 80/20 split. For  
280 each of the different splits, 20 repeated 10-fold cross validation was performed on the 80%  
281 component to optimize the mtry hyper-parameter by maximizing the AUC (Area Under the  
282 Curve of the Receiver Operator Characteristic). The resulting model was then tested on

283 the hold out data obtained from the 20% component. For all pre versus post-treatment  
284 models the optimized mtry was 2 and for all normal versus diagnosis models the optimized  
285 mtry was 2. The hyper-parameter, mtry, defines the number of variables to investigate at  
286 each split before a new division of the data was created with the Random Forest model  
287 [33].

288 For each of the pre versus post-treatment models assessment of the most important OTUs  
289 was then made by taking the top 10 OTUs by mean decrease in accuracy (MDA). These  
290 were then used to build each respective reduced OTU pre versus post-treatment model  
291 by diagnosis group to help avoid model overfitting. These reduced models were then put  
292 through the same process mentioned in the previous paragraph and were what was used  
293 for the final pre versus post-treatment models. For the normal versus diagnosis models  
294 the important OTUs were obtained by counting the number of times an OTU was present  
295 in the top 10% of MDA for each of the 100 different splits. This was then followed with  
296 filtering of this list to variables that were only present in more than 50% of these 100 runs.  
297 These corresponding reduced OTU normal versus diagnosis models were then put through  
298 the same process mentioned in the previous paragraph and were what was used for the  
299 final normal versus diagnosis models. For the pre versus post-treatment models the final  
300 optimized mtry was 2 and for the normal versus diagnosis models the final optimized mtry  
301 was 2.

302 Each model was then applied to our 67-person cohort [Table 1] based on diagnosis:  
303 adenoma (pre-treatment adenoma (adenoma n = 22 and disease free n = 0) versus  
304 post-treatment adenoma (adenoma n = 0 and disease free n = 22)), advanced adenoma  
305 pre-treatment advanced adenoma (advanced adenoma n = 19 and disease free n = 0 )  
306 versus post-treatment advanced adenoma (advanced adenoma n = 0 and disease free  
307 n = 19), and carcinoma (pre-treatment carcinoma (carinoma n = 26 and disease free n  
308 = 0) versus post-treatment carcinoma (carcinoma n = 1 and disease free n = 25)). The

309 application of the pre versus post-treatment models generated the probabilities that the  
310 sample was a pre-treatment sample. The application of the normal versus diagnosis  
311 models generated the probabilities that the sample was that specific diagnosis (adenoma,  
312 advanced adenoma, or carcinoma).

313 **Statistical Analysis.** The R software package (v3.3.2) was used for all statistical analysis.  
314 Comparisons between bacterial community structure utilized PERMANOVA [34] in the  
315 vegan package (v2.4.1). Comparisons between probabilities as well as overall differences  
316 in the median relative abundance of each OTU between pre and post-treatment samples  
317 utilized a paired Wilcoxon ranked sum test. Where multiple comparison testing was  
318 appropriate, a Benjamini-Hochberg (BH) correction was applied [35] and a corrected  
319 P-value of less than 0.05 was considered significant. The P-values reported are those  
320 that were BH corrected. Model rank importance was determined by obtaining the median  
321 MDA from the 100, 20 repeated 10-fold cross validation and then ranking from largest to  
322 smallest MDA.

323 **Reproducible Methods.** A detailed and reproducible description of how the data were  
324 processed and analyzed can be found at [https://github.com/SchlossLab/Sze\\_followUps\\_](https://github.com/SchlossLab/Sze_followUps_2017)  
325 2017. Raw sequences have been deposited into the NCBI Sequence Read Archive  
326 (SRP062005 and SRP096978) and the necessary metadata can be found at [https://www.](https://www.ncbi.nlm.nih.gov/Traces/study/)  
327 [ncbi.nlm.nih.gov/Traces/study/](https://www.ncbi.nlm.nih.gov/Traces/study/) and searching the respective SRA study accession.



328 **Figure 1: General differences between adenoma, advanced adenoma, and**  
329 **carcinoma groups after treatment.** A) Thetayc distance from pre versus post sample  
330 within each individual. A significant difference was found between the adenoma and  
331 carcinoma group for thetacyc (P-value = 5.36e-05). Solid black points represent the median  
332 value for each diagnosis group. B) NMDS of the pre and post-treatment samples for  
333 the adenoma group. C) NMDS of the pre and post-treatment samples for the advanced  
334 adenoma group. D) NMDS of the pre and post-treatment samples for the carcinoma group.

335 **Figure 2: The 10 OTUs used to classify treatment for adenoma, advanced adenoma,**  
336 **and carcinoma.** A) Adenoma OTUs. B) Advanced Adenoma OTUs. C) Carcinoma OTUs.

337 **Figure 3: OTUs common to those models used to differentiate between patients**  
338 **with normal colons and those with adenoma, advanced adenoma, and carcinoma.**  
339 A) Venn diagram showing the OTU overlap between each model. B) For each common  
340 OTU the lowest taxonomic identification and importance rank for each model run is shown.

341 **Figure 4: Treatment response based on models built for adenoma, advanced**  
342 **adenoma, or carcinoma.** A) Positive probability change from initial to follow up sample in  
343 those with adenoma. B) Positive probability change from initial to follow up sample in those  
344 with advanced adenoma. C) Positive probability change from initial to follow up sample in  
345 those with carcinoma.

346 **Table 1: Demographic data of patients in the pre and post-treatment cohort**

|                                          | Adenoma         | Advanced Adenoma | Carcinoma        |
|------------------------------------------|-----------------|------------------|------------------|
| n                                        | 22              | 19               | 26               |
| Age (Mean $\pm$ SD)                      | 61.68 $\pm$ 7.2 | 63.11 $\pm$ 10.9 | 61.65 $\pm$ 12.9 |
| Sex (%F)                                 | 36.36           | 36.84            | 42.31            |
| BMI (Mean $\pm$ SD)                      | 26.86 $\pm$ 3.9 | 25.80 $\pm$ 4.7  | 28.63 $\pm$ 7.2  |
| Caucasian (%)                            | 95.45           | 84.21            | 96.15            |
| Days Between Colonoscopy (Mean $\pm$ SD) | 255.41 $\pm$ 42 | 250.16 $\pm$ 41  | 350.85 $\pm$ 102 |

347 **Table 2: Demographic data of training cohort**

|                     | Normal          | Adenoma          | Advanced Adenoma | Carcinoma        |
|---------------------|-----------------|------------------|------------------|------------------|
| n                   | 172             | 67               | 90               | 94               |
| Age (Mean $\pm$ SD) | 54.29 $\pm$ 9.9 | 63.01 $\pm$ 13.1 | 64.07 $\pm$ 11.3 | 64.37 $\pm$ 12.9 |
| Sex (%F)            | 64.53           | 46.27            | 37.78            | 43.62            |
| BMI (Mean $\pm$ SD) | 26.96 $\pm$ 5.3 | 25.68 $\pm$ 4.8  | 26.66 $\pm$ 4.9  | 29.27 $\pm$ 6.7  |
| Caucasian (%)       | 87.79           | 92.54            | 92.22            | 94.68            |

348 **Figure S1: ROC curves of the adenoma, advanced adenoma, and carcinoma**  
349 **models.** A) Adenoma ROC curve: The light green shaded areas represent the range of  
350 values of a 100 different 80/20 splits of the test set data and the dark green line represents  
351 the model using 100% of the data set and what was used for subsequent classification. B)  
352 Advanced Adenoma ROC curve: The light yellow shaded areas represent the range of  
353 values of a 100 different 80/20 splits of the test set data and the dark yellow line represents  
354 the model using 100% of the data set and what was used for subsequent classification. C)  
355 Carcinoma ROC curve: The light red shaded areas represent the range of values of a 100  
356 different 80/20 splits of the test set data and the dark red line represents the model using  
357 100% of the data set and what was used for subsequent classification.

358 **Figure S2: Summary of important OTUs for the adenoma, advanced adenoma, and**  
359 **carcinoma models.** A) MDA of the most important variables in the adenoma model. The  
360 dark green point represents the mean and the lighter green points are the value of each  
361 of the 100 different runs. B) Summary of Important Variables in the advanced adenoma  
362 model. MDA of the most important variables in the SRN model. The dark yellow point  
363 represents the mean and the lighter yellow points are the value of each of the 100 different  
364 runs. C) MDA of the most important variables in the carcinoma model. The dark red point  
365 represents the mean and the lighter red points are the value of each of the 100 different  
366 runs.

367 **Figure S3: Pre and post-treatment relative abundance of CRC associated OTUs**  
368 **within the carcinoma model.**

## 369 **Declarations**

### 370 **Ethics approval and consent to participate**

371 The University of Michigan Institutional Review Board approved this study, and all subjects  
372 provided informed consent. This study conformed to the guidelines of the Helsinki  
373 Declaration.

### 374 **Consent for publication**

375 Not applicable.

### 376 **Availability of data and material**

377 A detailed and reproducible description of how the data were processed and analyzed can  
378 be found at [https://github.com/SchlossLab/Sze\\_followUps\\_2017](https://github.com/SchlossLab/Sze_followUps_2017). Raw sequences have  
379 been deposited into the NCBI Sequence Read Archive (SRP062005 and SRP096978) and  
380 the necessary metadata can be found at <https://www.ncbi.nlm.nih.gov/Traces/study/> and  
381 searching the respective SRA study accession.

### 382 **Competing Interests**

383 All authors declare that they do not have any relevant competing interests to report.

## 384 **Funding**

385 This study was supported by funding from the National Institutes of Health to P.  
386 Schloss (R01GM099514, P30DK034933) and to the Early Detection Research Network  
387 (U01CA86400).

## 388 **Authors' contributions**

389 All authors were involved in the conception and design of the study. MAS analyzed the  
390 data. NTB processed samples and analyzed the data. All authors interpreted the data.  
391 MAS and PDS wrote the manuscript. All authors reviewed and revised the manuscript. All  
392 authors read and approved the final manuscript.

## 393 **Acknowledgements**

394 The authors thank the Great Lakes-New England Early Detection Research Network  
395 for providing the fecal samples that were used in this study. We would also like to  
396 thank Amanda Elmore for reviewing and correcting code error and providing feedback on  
397 manuscript drafts. We would also like to thank Nicholas Lesniak for providing feedback on  
398 manuscript drafts.

## 399 **References**

- 400 1. Siegel RL, Miller KD, Jemal A. Cancer statistics, 2016. *CA: a cancer journal for clinicians*.  
401 2016;66:7–30.
- 402 2. Hagggar FA, Boushey RP. Colorectal cancer epidemiology: Incidence, mortality, survival,  
403 and risk factors. *Clinics in Colon and Rectal Surgery*. 2009;22:191–7.
- 404 3. Hellinger MD, Santiago CA. Reoperation for recurrent colorectal cancer. *Clinics in Colon*  
405 *and Rectal Surgery*. 2006;19:228–36.
- 406 4. Ryuk JP, Choi G-S, Park JS, Kim HJ, Park SY, Yoon GS, et al. Predictive factors and the  
407 prognosis of recurrence of colorectal cancer within 2 years after curative resection. *Annals*  
408 *of Surgical Treatment and Research*. 2014;86:143–51.
- 409 5. Institute NC. SEER Cancer Stat Facts: Colon and Rectum Cancer [Internet]. [cited 2017  
410 Apr 27]. Available from: <http://seer.cancer.gov/statfacts/html/colorect.html>
- 411 6. Goodwin AC, Destefano Shields CE, Wu S, Huso DL, Wu X, Murray-Stewart TR, et al.  
412 Polyamine catabolism contributes to enterotoxigenic *Bacteroides fragilis*-induced colon  
413 tumorigenesis. *Proceedings of the National Academy of Sciences of the United States of*  
414 *America*. 2011;108:15354–9.
- 415 7. Abed J, Emgård JEM, Zamir G, Faroja M, Almogy G, Grenov A, et al. Fap2  
416 Mediates *Fusobacterium nucleatum* Colorectal Adenocarcinoma Enrichment by Binding to  
417 Tumor-Expressed Gal-GalNAc. *Cell Host & Microbe*. 2016;20:215–25.
- 418 8. Arthur JC, Gharaibeh RZ, Mühlbauer M, Perez-Chanona E, Uronis JM, McCafferty J, et  
419 al. Microbial genomic analysis reveals the essential role of inflammation in bacteria-induced

420 colorectal cancer. *Nature Communications*. 2014;5:4724.

421 9. Kostic AD, Chun E, Robertson L, Glickman JN, Gallini CA, Michaud M, et al.  
422 *Fusobacterium nucleatum* potentiates intestinal tumorigenesis and modulates the  
423 tumor-immune microenvironment. *Cell Host & Microbe*. 2013;14:207–15.

424 10. Wu S, Rhee K-J, Albesiano E, Rabizadeh S, Wu X, Yen H-R, et al. A human  
425 colonic commensal promotes colon tumorigenesis via activation of T helper type 17 T cell  
426 responses. *Nature Medicine*. 2009;15:1016–22.

427 11. Zackular JP, Baxter NT, Chen GY, Schloss PD. Manipulation of the Gut Microbiota  
428 Reveals Role in Colon Tumorigenesis. *mSphere*. 2016;1.

429 12. Zackular JP, Baxter NT, Iverson KD, Sadler WD, Petrosino JF, Chen GY, et al. The gut  
430 microbiome modulates colon tumorigenesis. *mBio*. 2013;4:e00692–00613.

431 13. Baxter NT, Zackular JP, Chen GY, Schloss PD. Structure of the gut microbiome following  
432 colonization with human feces determines colonic tumor burden. *Microbiome*. 2014;2:20.

433 14. Flynn KJ, Baxter NT, Schloss PD. Metabolic and Community Synergy of Oral Bacteria  
434 in Colorectal Cancer. *mSphere*. 2016;1.

435 15. Wang T, Cai G, Qiu Y, Fei N, Zhang M, Pang X, et al. Structural segregation of gut  
436 microbiota between colorectal cancer patients and healthy volunteers. *The ISME journal*.  
437 2012;6:320–9.

438 16. Chen H-M, Yu Y-N, Wang J-L, Lin Y-W, Kong X, Yang C-Q, et al. Decreased dietary  
439 fiber intake and structural alteration of gut microbiota in patients with advanced colorectal  
440 adenoma. *The American Journal of Clinical Nutrition*. 2013;97:1044–52.

441 17. Chen W, Liu F, Ling Z, Tong X, Xiang C. Human intestinal lumen and mucosa-associated



442 microbiota in patients with colorectal cancer. *PLoS One*. 2012;7:e39743.

443 18. Shen XJ, Rawls JF, Randall T, Burcal L, Mpande CN, Jenkins N, et al. Molecular  
444 characterization of mucosal adherent bacteria and associations with colorectal adenomas.  
445 *Gut Microbes*. 2010;1:138–47.

446 19. Kostic AD, Gevers D, Pedamallu CS, Michaud M, Duke F, Earl AM, et al. Genomic  
447 analysis identifies association of *Fusobacterium* with colorectal carcinoma. *Genome*  
448 *Research*. 2012;22:292–8.

449 20. Feng Q, Liang S, Jia H, Stadlmayr A, Tang L, Lan Z, et al. Gut microbiome  
450 development along the colorectal adenoma-carcinoma sequence. *Nature Communications*.  
451 2015;6:6528.

452 21. Dejea CM, Wick EC, Hechenbleikner EM, White JR, Mark Welch JL, Rossetti BJ, et al.  
453 Microbiota organization is a distinct feature of proximal colorectal cancers. *Proceedings of*  
454 *the National Academy of Sciences of the United States of America*. 2014;111:18321–6.

455 22. Mima K, Sukawa Y, Nishihara R, Qian ZR, Yamauchi M, Inamura K, et al.  
456 *Fusobacterium nucleatum* and T Cells in Colorectal Carcinoma. *JAMA oncology*.  
457 2015;1:653–61.

458 23. Arthur JC, Perez-Chanona E, Mühlbauer M, Tomkovich S, Uronis JM, Fan T-J, et al.  
459 Intestinal inflammation targets cancer-inducing activity of the microbiota. *Science (New*  
460 *York, N.Y.)*. 2012;338:120–3.

461 24. Baxter NT, Ruffin MT, Rogers MAM, Schloss PD. Microbiota-based model improves the  
462 sensitivity of fecal immunochemical test for detecting colonic lesions. *Genome Medicine*.  
463 2016;8:37.

464 25. Zeller G, Tap J, Voigt AY, Sunagawa S, Kultima JR, Costea PI, et al. Potential of

- 465 fecal microbiota for early-stage detection of colorectal cancer. *Molecular Systems Biology*.  
466 2014;10:766.
- 467 26. Zackular JP, Rogers MAM, Ruffin MT, Schloss PD. The human gut microbiome as  
468 a screening tool for colorectal cancer. *Cancer Prevention Research (Philadelphia, Pa.)*.  
469 2014;7:1112–21.
- 470 27. O'Brien CL, Allison GE, Grimpen F, Pavli P. Impact of colonoscopy bowel preparation  
471 on intestinal microbiota. *PLoS One*. 2013;8:e62815.
- 472 28. Kozich JJ, Westcott SL, Baxter NT, Highlander SK, Schloss PD. Development of a  
473 dual-index sequencing strategy and curation pipeline for analyzing amplicon sequence  
474 data on the MiSeq Illumina sequencing platform. *Applied and Environmental Microbiology*.  
475 2013;79:5112–20.
- 476 29. Pruesse E, Quast C, Knittel K, Fuchs BM, Ludwig W, Peplies J, et al. SILVA: A  
477 comprehensive online resource for quality checked and aligned ribosomal RNA sequence  
478 data compatible with ARB. *Nucleic Acids Research*. 2007;35:7188–96.
- 479 30. Edgar RC, Haas BJ, Clemente JC, Quince C, Knight R. UCHIME improves sensitivity  
480 and speed of chimera detection. *Bioinformatics (Oxford, England)*. 2011;27:2194–200.
- 481 31. Wang Q, Garrity GM, Tiedje JM, Cole JR. Naive Bayesian classifier for rapid  
482 assignment of rRNA sequences into the new bacterial taxonomy. *Applied and  
483 Environmental Microbiology*. 2007;73:5261–7.
- 484 32. Schloss PD, Westcott SL. Assessing and improving methods used in operational  
485 taxonomic unit-based approaches for 16S rRNA gene sequence analysis. *Applied and  
486 Environmental Microbiology*. 2011;77:3219–26.
- 487 33. Breiman L. Random Forests. *Machine Learning [Internet]*. 2001 [cited 2013 Feb

488 7];45:5–32. Available from: <http://link.springer.com/article/10.1023/A%3A1010933404324>  
489 <http://link.springer.com/article/10.1023%2FA%3A1010933404324?LI=true>

490 34. Anderson MJ, Walsh DCI. PERMANOVA, ANOSIM, and the Mantel test in the face of  
491 heterogeneous dispersions: What null hypothesis are you testing? *Ecological Monographs*  
492 [Internet]. 2013 [cited 2017 Jan 5];83:557–74. Available from: [http://doi.wiley.com/10.1890/](http://doi.wiley.com/10.1890/12-2010.1)  
493 12-2010.1

494 35. Benjamini Y, Hochberg Y. Controlling the false discovery rate: A practical and  
495 powerful approach to multiple testing. *Journal of the Royal Statistical Society. Series B*  
496 (Methodological). 1995;57:289–300.

**A**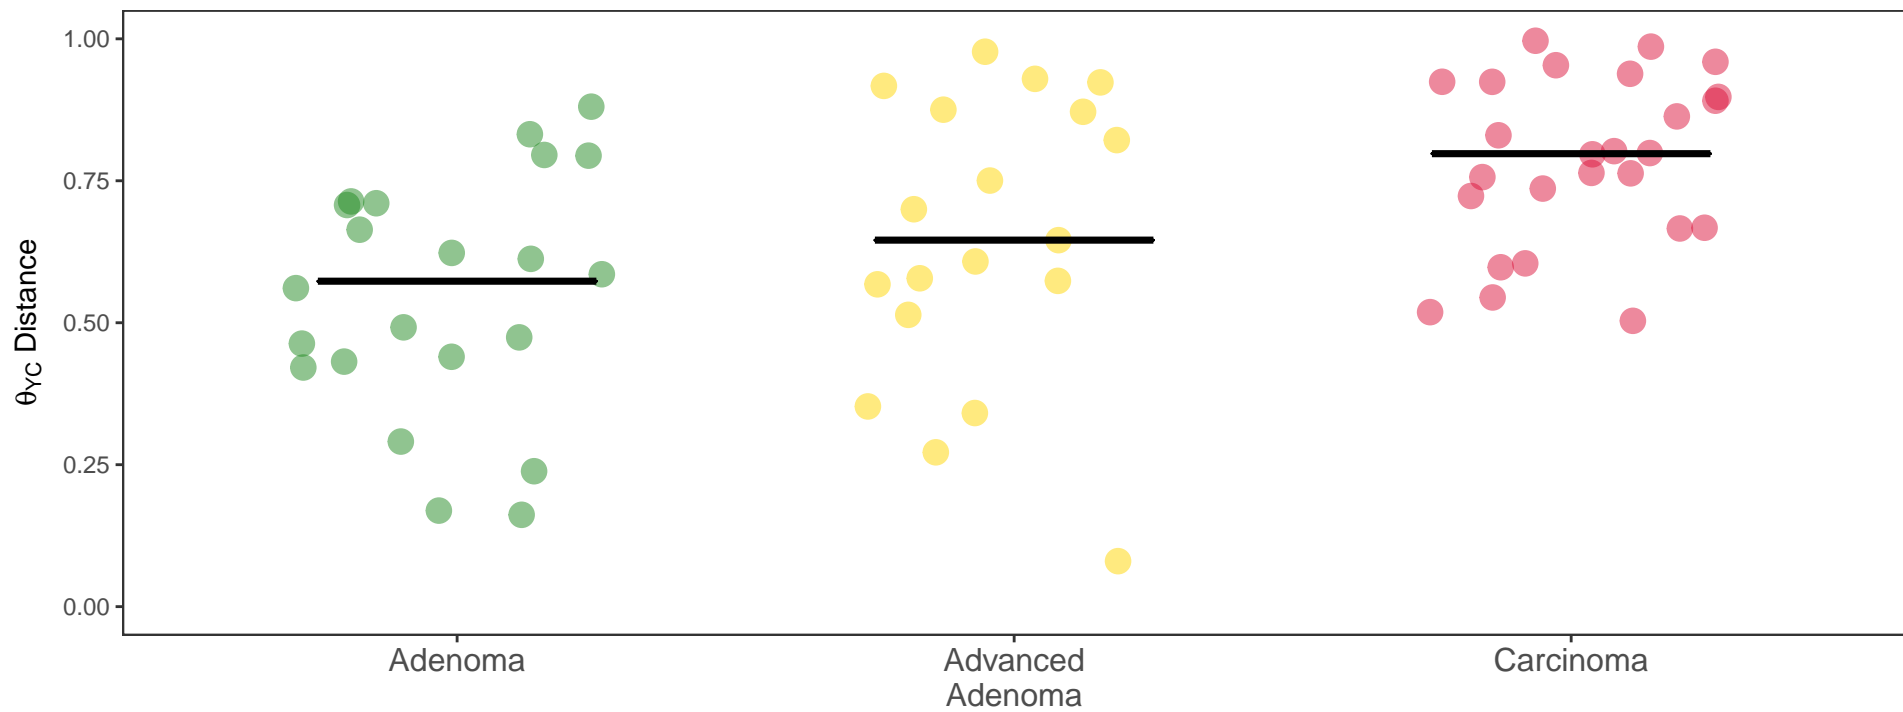**B**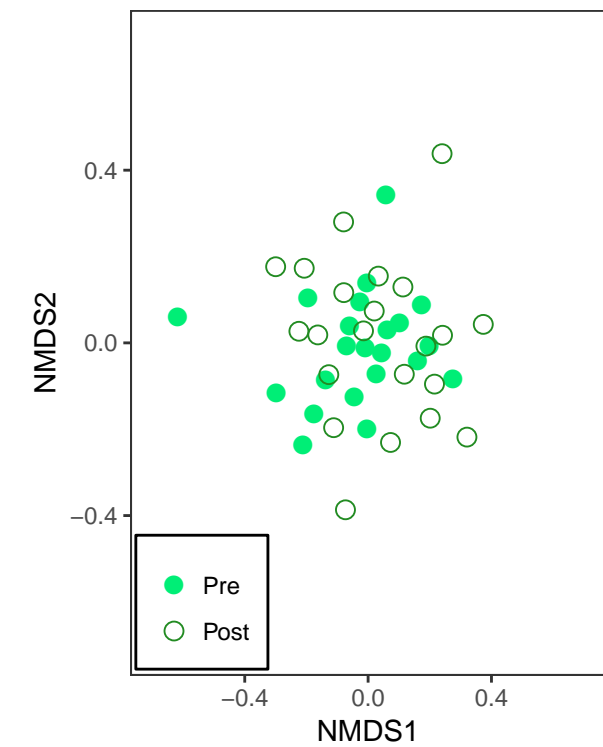**C**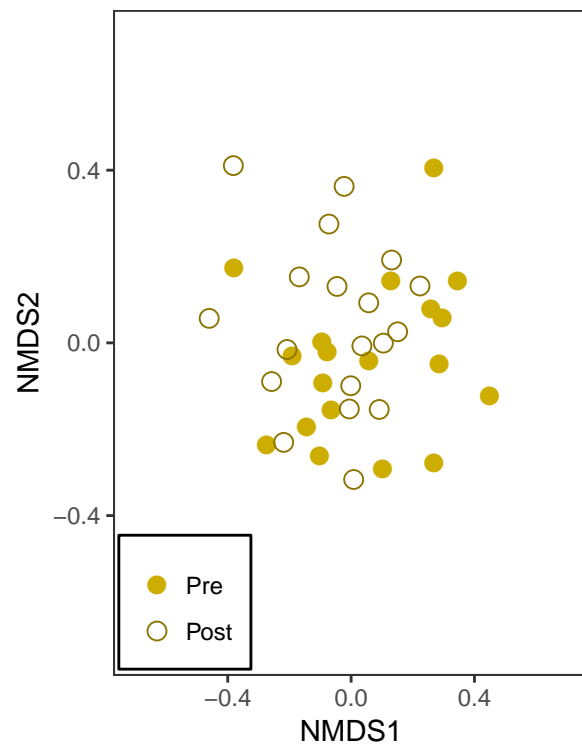**D**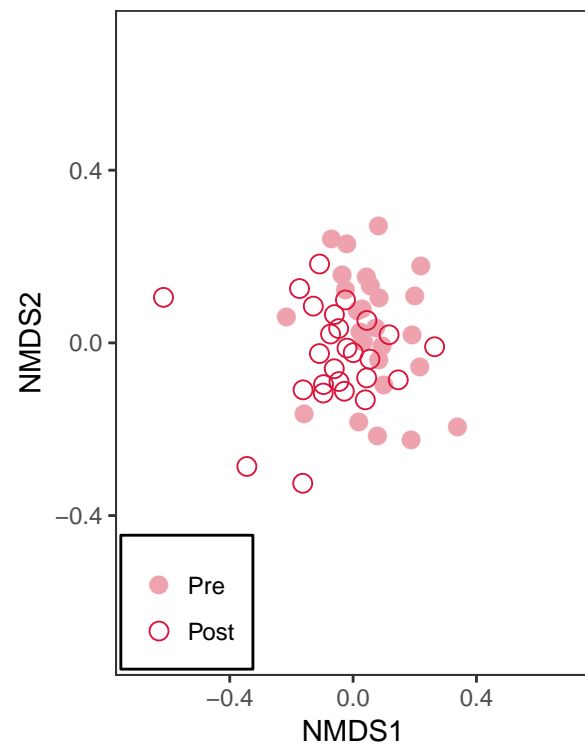

**A**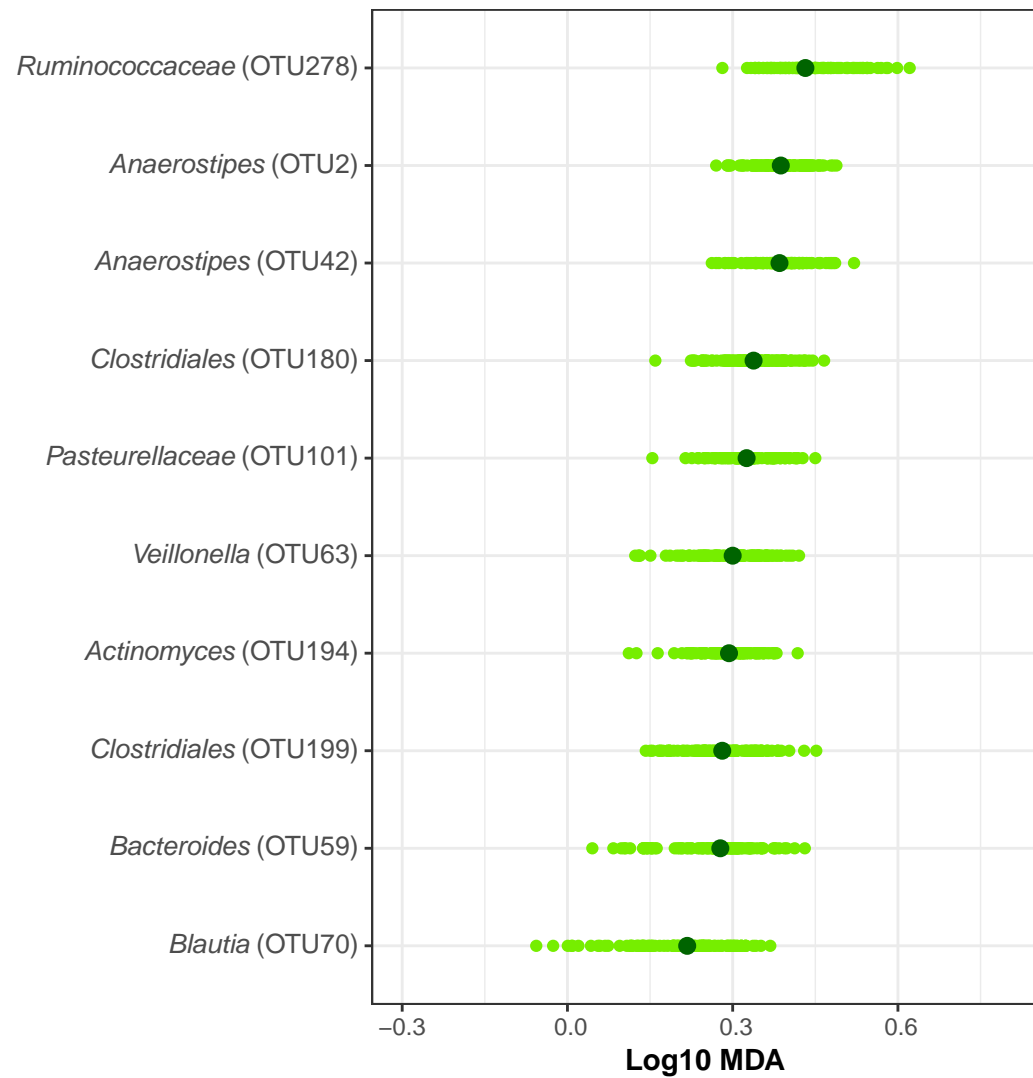**B**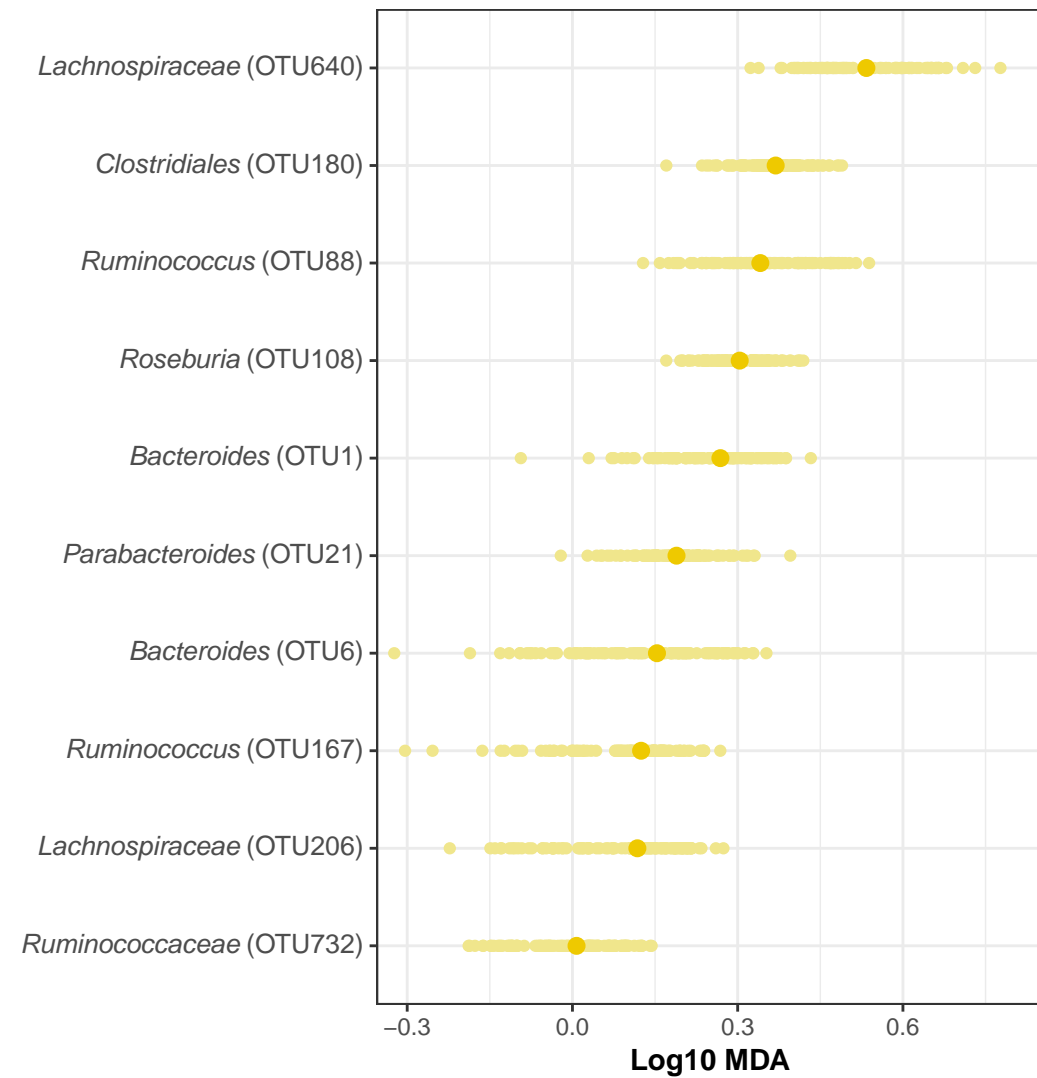**C**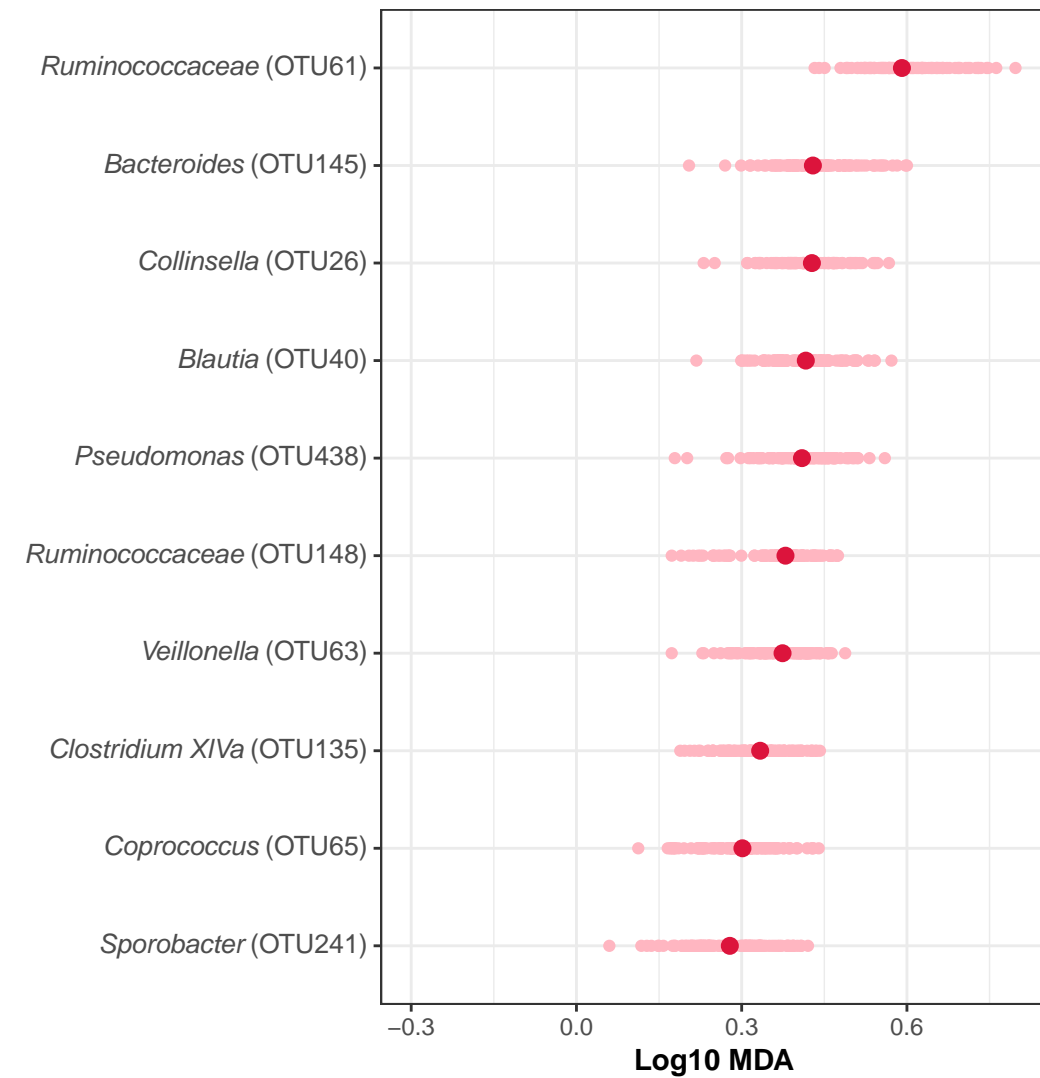

**A****Adenoma****Advanced Adenoma**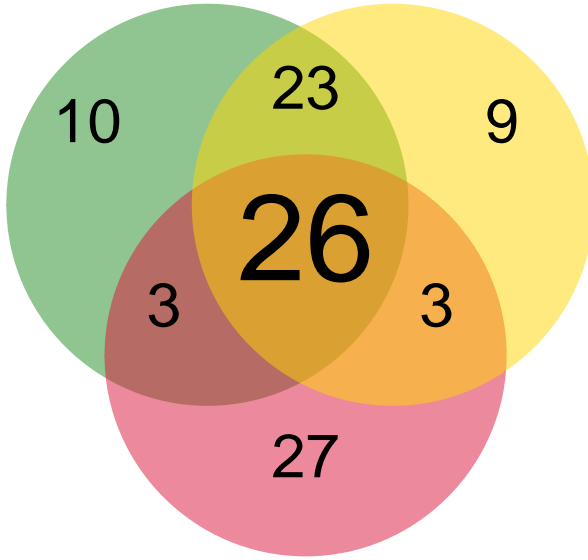**Carcinoma****B**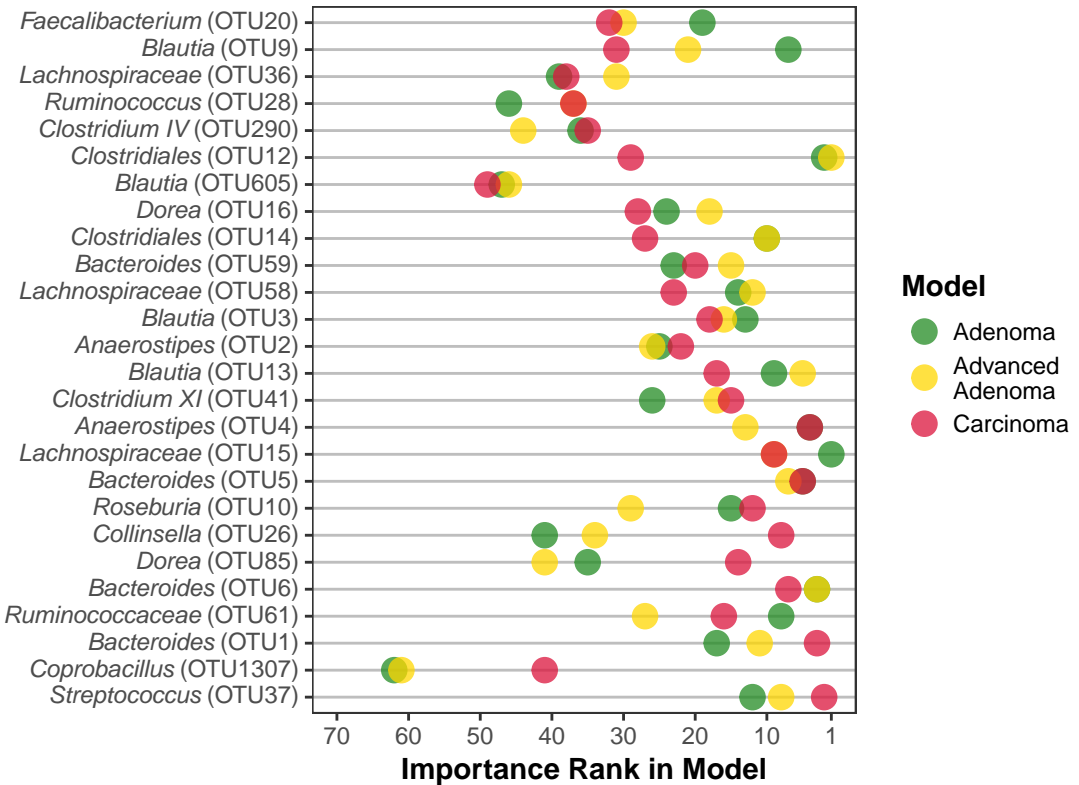

**A**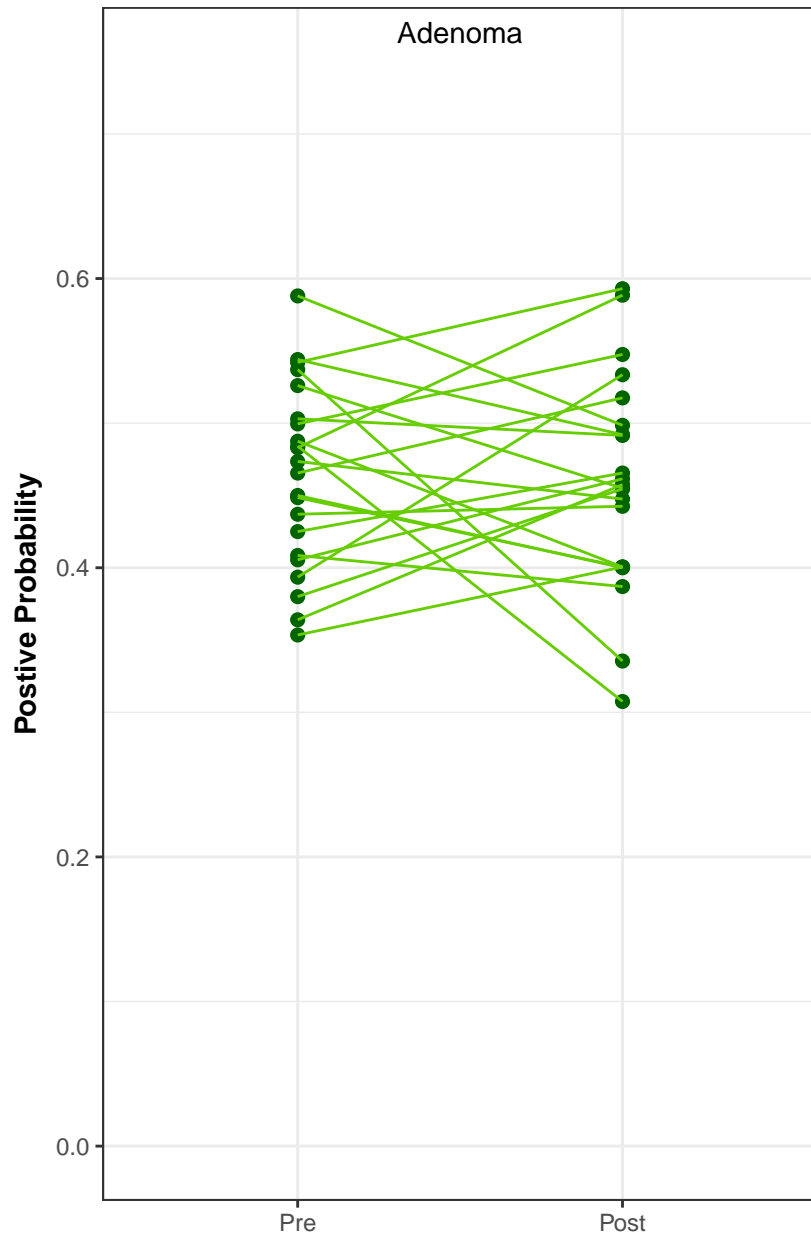**B**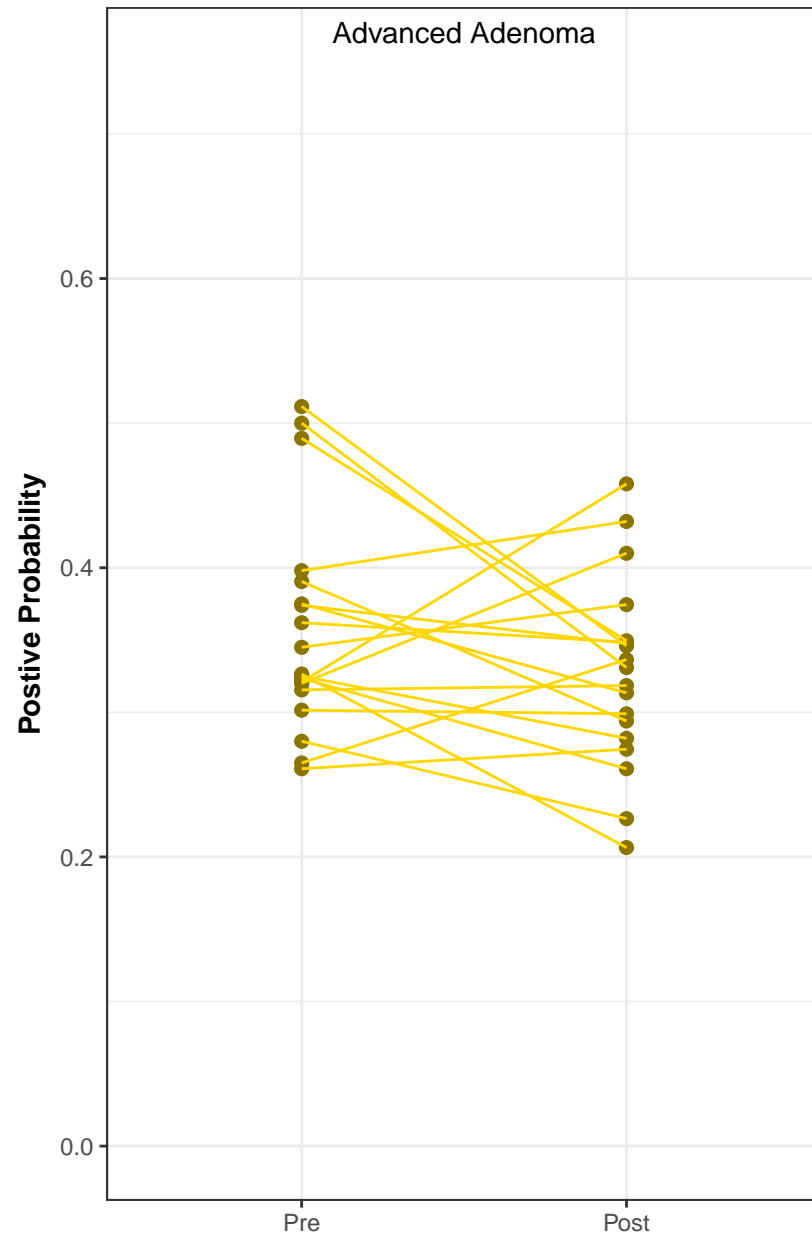**C**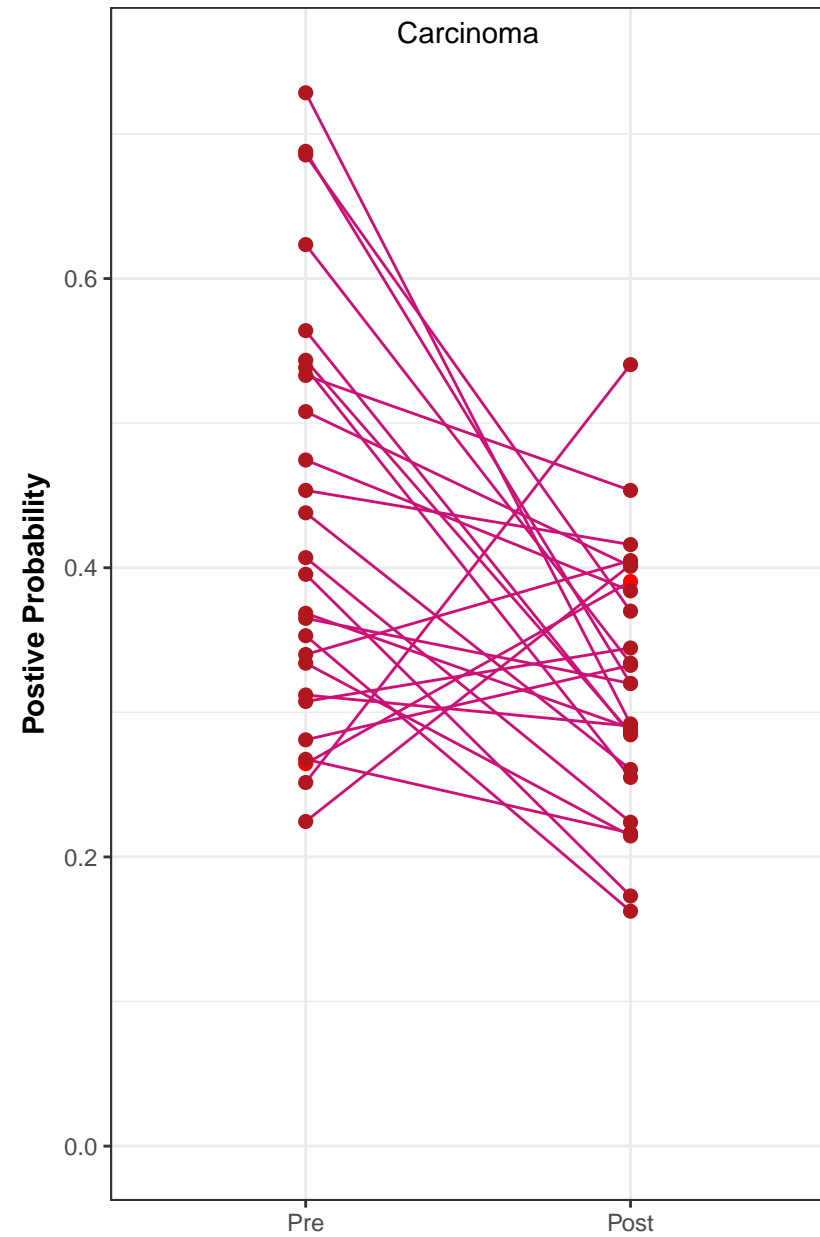

Source: http://biorxiv.org/content/10.1101/138222v1.full.pdf
